# Supplementary material for: Dissecting the multifaceted contribution of the mitochondrial genome to autism spectrum disorder
Source: Front Genet. 2022 Nov 7;13:953762. doi: 10.3389/fgene.2022.953762 (PMC9676943; doi:10.3389/fgene.2022.953762)
Supplement: Supplementary file 2 [file Table3.xlsx]

## Sheet: Supplementary Table S3
Family ID	ID	Who	ASD	Sex	Haplogroup	Variant	Ref	Alt	Gene	Heteroplasmy	GB	MitoTip
39	BEL_39.2	mother	no	f	U5a1a1	629	T	C	TF	1	134	Likely benign
39	BEL_39.3	offspring	yes	m	U5a1a1	629	T	C	TF	1	134	Likely benign
92	BEL_92.1	father	no	m	U3b	1658	T	C	TV	1	4	Possibly benign
99	BEL_99.1	father	no	m	J1c	1664	G	A	TV	1	146	Likely benign
42	BEL_42.2	mother	no	f	L2a1i1	4313	T	C	TI	1	43	Likely benign
42	BEL_42.3	offspring	yes	m	L2a1i1	4313	T	C	TI	1	43	Likely benign
42	BEL_42.4	offspring	no	f	L2a1i1	4313	T	C	TI	1	43	Likely benign
33	BEL_33.2	mother	no	f	H5	4314	T	A	TI	1	6	Likely benign
33	BEL_33.3	offspring	yes	m	H5	4314	T	A	TI	1	43	Likely benign
33	BEL_33.4	offspring	no	m	H5	4314	T	A	TI	1	43	Likely benign
93	BEL_93.2	mother	no	f	H15a1	5528	T	C	TW	0.42	14	Likely benign
93	BEL_93.3	offspring	yes	m	H15a1	5528	T	C	TW	0.59	14	Likely benign
93	BEL_93.4	offspring	no	m	H15a1	5528	T	C	TW	0.48	14	Likely benign
18	BEL_18.2	mother	no	f	HV0f	5628	T	C	TA	1	97	Likely pathogenic
18	BEL_18.3	offspring	yes	m	HV0f	5628	T	C	TA	1	97	Likely pathogenic
18	BEL_18.4	offspring	no	f	HV0f	5628	T	C	TA	1	97	Likely pathogenic
42	BEL_42.2	mother	no	f	L2a1i1	5655	T	C	TA	1	324	Possibly benign
42	BEL_42.3	offspring	yes	m	L2a1i1	5655	T	C	TA	1	324	Possibly benign
42	BEL_42.4	offspring	no	f	L2a1i1	5655	T	C	TA	1	324	Possibly benign
99	BEL_99.2	mother	no	f	H13a1	5673	T	C	TN	1	9	Likely benign
99	BEL_99.3	offspring	yes	m	H13a1	5673	T	C	TN	1	9	Likely benign
99	BEL_99.4	offspring	yes	m	H13a1	5673	T	C	TN	1	9	Likely benign
90	BEL_90.2	mother	no	f	U1a1a	5774	T	C	TC	1	53	Likely benign
90	BEL_90.3	offspring	yes	f	U1a1a	5774	T	C	TC	1	53	Likely benign
90	BEL_90.4	offspring	no	m	U1a1a	5774	T	C	TC	1	53	Likely benign
96	BEL_96.2	mother	no	f	HV0	5806	T	C	TC	1	19	Likely benign
96	BEL_96.3	offspring	yes	m	HV0	5806	T	C	TC	1	19	Likely benign
96	BEL_96.4	offspring	no	f	HV0	5806	T	C	TC	1	19	Likely benign
30	BEL_30.2	mother	no	f	C1b	7474	A	G	TS1	1	4	Likely benign
30	BEL_30.3	offspring	yes	m	C1b	7474	A	G	TS1	1	4	Likely benign
30	BEL_30.4	offspring	no	m	C1b	7474	A	G	TS1	1	4	Likely benign
28	BEL_28.2	mother	no	f	H1e1a	7490	A	G	TS1	0.24	8	Likely benign
28	BEL_28.4	offspring	no	f	H1e1a	7490	A	G	TS1	0.21	8	Likely benign
30	BEL_30.1	father	no	m	C1b	7543	A	G	TD	1	47	Possibly pathogenic
66	BEL_66.1	father	no	m	K1b2a1	7543	A	G	TD	1	47	Possibly pathogenic
83	BEL_83.2	mother	no	f	H1b1_16362	8348	A	G	TK	1	118	Possibly benign
83	BEL_83.3	offspring	yes	f	H1b1_16362	8348	A	G	TK	1	118	Possibly benign
28	BEL_28.1	father	no	m	J1c	10410	T	C	TR	1	236	Likely benign
48	BEL_48.2	mother	no	f	U3b2	10410	T	C	TR	1	236	Likely benign
48	BEL_48.3	offspring	yes	m	U3b2	10410	T	C	TR	1	236	Likely benign
48	BEL_48.4	offspring	no	m	U3b2	10410	T	C	TR	1	236	Likely benign
78	BEL_78.2	mother	no	f	L2a1c5	10410	T	C	TR	1	236	Likely benign
78	BEL_78.3	offspring	yes	f	L2a1c5	10410	T	C	TR	1	236	Likely benign
78	BEL_78.4	offspring	no	m	L2a1c5	10410	T	C	TR	1	236	Likely benign
8	BEL_8.2	mother	no	f	U3b2	10446	A	G	TR	1	5	Likely benign
8	BEL_8.3	offspring	yes	m	U3b2	10446	A	G	TR	1	5	Likely benign
8	BEL_8.4	offspring	no	f	U3b2	10446	A	G	TR	1	5	Likely benign
49	BEL_49.2	mother	no	f	H1	10463	T	C	TR	1	2384	Likely benign
49	BEL_49.3	offspring	yes	m	H1	10463	T	C	TR	1	2384	Likely benign
26	BEL_26.1	father	no	m	K1a4c1	12173	T	C	TH	1	16	Likely benign
14	BEL_14.2	mother	no	f	H27	12188	T	C	TH	1	27	Likely benign
14	BEL_14.3	offspring	yes	m	H27	12188	T	C	TH	1	27	Likely benign
14	BEL_14.4	offspring	yes	m	H27	12188	T	C	TH	1	27	Likely benign
99	BEL_99.1	father	no	m	J1c	12192	G	A	TH	1	112	Likely benign
36	BEL_36.1	father	no	m	B2b	12217	A	G	TS2	1	11	Likely benign
24	BEL_24.2	mother	no	f	W1	12234	A	G	TS2	1	182	Likely benign
24	BEL_24.3	offspring	yes	m	W1	12234	A	G	TS2	1	182	Likely benign
24	BEL_24.4	offspring	yes	m	W1	12234	A	G	TS2	1	182	Likely benign
85	BEL_85.2	mother	no	f	H5	12236	G	A	TS2	1	373	Likely benign
85	BEL_85.3	offspring	yes	m	H5	12236	G	A	TS2	1	373	Likely benign
85	BEL_85.4	offspring	yes	m	H5	12236	G	A	TS2	1	373	Likely benign
31	BEL_31.2	mother	no	f	HV0	14696	A	G	TE	1	46	Likely benign
31	BEL_31.3	offspring	yes	m	HV0	14696	A	G	TE	1	46	Likely benign
31	BEL_31.4	offspring	no	f	HV0	14696	A	G	TE	1	46	Likely benign
43	BEL_43.2	mother	no	f	B2q	15900	T	C	TT	1	70	Likely benign
43	BEL_43.3	offspring	yes	m	B2q	15900	T	C	TT	1	70	Likely benign
55	BEL_55.1	father	no	m	D1	15939	C	T	TT	0.87	54	Likely benign
32	BEL_32.2	mother	no	f	U3b	15944	T	del	TT	1	754	Likely benign
32	BEL_32.3	offspring	yes	m	U3b	15944	T	del	TT	1	754	Likely benign
32	BEL_32.4	offspring	no	m	U3b	15944	T	del	TT	1	754	Likely benign
5	BEL_5.2	mother	no	f	J1c1	15968	T	C	TP	1	217	Likely benign
5	BEL_5.3	offspring	yes	m	J1c1	15968	T	C	TP	1	217	Likely benign

## Sheet: Legend
Table S3 - Database of the test cohort reporting private variants in tRNA genes for each subjects with related pathogenicity classification
Family ID	Unique identification code of family
ID	Unique identification code of individual
Who	Relationship between family members (mother, father, offspring)
ASD	Indicates whether the subject has ASD or not
Sex	Indicates the gender of the subject
Haplogroup	Indicates mitochondrial haplogroup (set of variants in mitochondrial DNA deriving from the same haplotype), according to mtDNA tree Build 17 of www.phylotree.org database
Variant	nucleotide position on variant
Ref	Nucleotide in reference sequence (NC_012920.1)
Alt	Nucleotide in alternative seqeunce
Gene	Mitochondrial gene
Heteroplasmy	% of Alt nucleotide
GB	Frequence in GenBank database
MitoTip	categorical prediction for MitoTip
